# Supplementary material
Source: PubMed Central journal article supplement (PMC7108160)
Supplement: fig1s.pdf [file fig1s.pdf]

A)

| Primer       | Sequence (5' to 3')                 |
|--------------|-------------------------------------|
| F3           | CTTAGGATTGCCTACG                    |
| B3c          | AGTCCAGTTACATTTTCT                  |
| FIP (F1c+F2) | AGTGTGCTGTTTCAGTAGTGATTCATCACAGGGTT |
| BIP (B1+B2c) | TGTAATGTCAACCGCTTTGCGACGTGGTATTTTC  |
| LoopB        | TCTTTATGACAAACTGCAAT                |
| LoopFc       | TTTGTGTGAATATGACATAGTCATA           |

B)

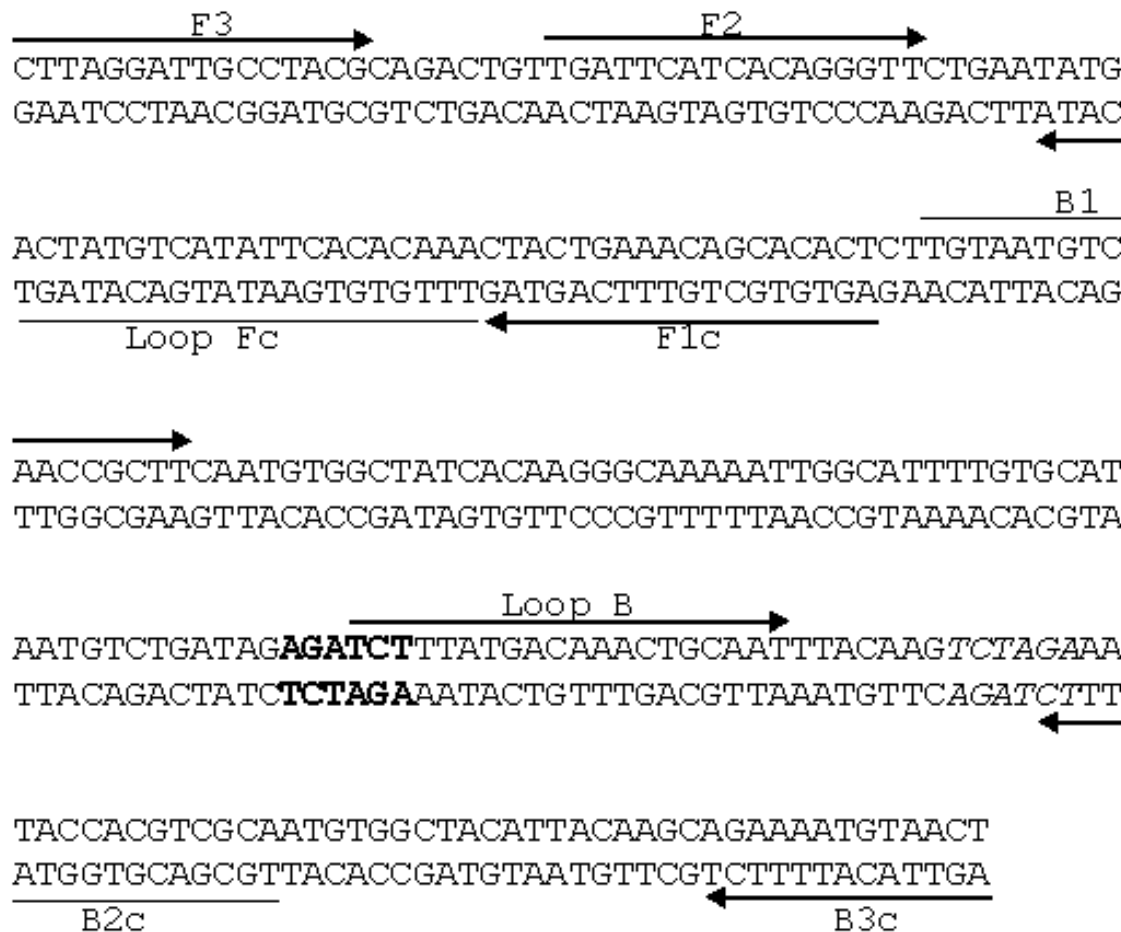

Supplementary Figure 1S. A) Primer sequences used in the LAMP assay. B) SARS-Cov viral sequence used in the assay. Corresponding recognition sequences of the primers are indicated by arrows. The Bgl II and Xba I restriction sites are bolded and italicized, respectively.
