# Supplementary material
Source: PubMed Central journal article supplement (PMC7108160)
Supplement: fig2s.pdf [file fig2s.pdf]

A)

Copy number  
per reaction: 0 10 10<sup>2</sup> 10<sup>3</sup> 10<sup>4</sup> 10<sup>5</sup> 10<sup>6</sup> 10<sup>7</sup>

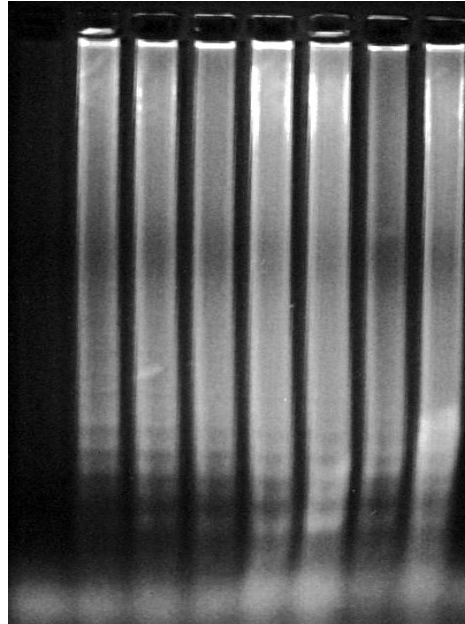

B)

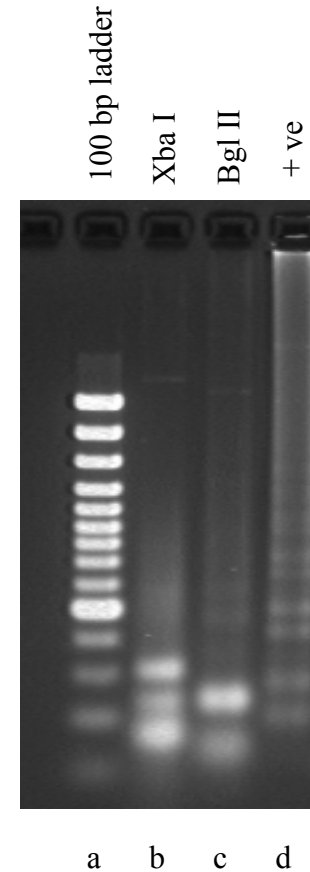

Supplementary Figure 2S. A) Detection of SARS-CoV by LAMP. The copy numbers of the target sequence used per reaction are indicated. B) Restriction digestions of LAMP products. Lane a, 100 bp ladder DNA markers; b, Xba I digested DNA products; C, Bgl II digested DNA products; D, undigested positive control.
